# Supplementary material for: Naphthoquinone-Based Meroterpenoids from Marine-Derived Streptomyces sp. B9173
Source: PubMed Central journal article supplement (PMC7463872; doi:10.3390/biom10081187), 2020-08-15
Supplement: biomolecules-10-01187-s001.pdf [file biomolecules-10-01187-s001.pdf]

# Naphthoquinone-Based Meroterpenoids from Marine-Derived *Streptomyces* sp. B9173

Xinqian Shen †, Xiaozheng Wang †, Tingting Huang \*, Zixin Deng and Shuangjun Lin \*

State Key Laboratory of Microbial Metabolism, and Joint International Research Laboratory on Metabolic & Developmental Sciences, and School of Life Sciences & Biotechnology, Shanghai Jiao Tong University; 800 Dongchuan Rd, Shanghai 200240, China; asznpb@sjtu.edu.cn (X.S.); wangxiaozheng@sjtu.edu.cn (X.W.); zxdeng@sjtu.edu.cn (Z.D.)

\* Correspondence: tingwing82@sjtu.edu.cn (T.H.); linsj@sjtu.edu.cn (S.L.); Tel.: +86-21-3420-4710 (S.L.)

† These two authors contribute equally to this work.

## Supplementary information

**Figure S1.** HPLC profile of *Streptomyces* sp. B9173 metabolites in MS media.

**Figure S2.** Sequence alignment of the type III PKS from gene clusters of naphthoquinone containing compounds.

**Figure S3.** NMR spectra of faviogeranin B1 (1).

**Figure S4.** NMR spectra of flaviogeranin B2 (2).

**Figure S5.** NMR spectra of flaviogeranin D (3).

**Figure S6.** <sup>1</sup>H NMR spectrum of flaviogeranin C1 (4).

**Figure S7.** <sup>1</sup>H NMR spectrum of flaviogeranin C2 (5).

**Figure S8.** <sup>1</sup>H NMR spectrum of flaviogeranin A1 (6).

**Figure S9.** <sup>1</sup>H NMR spectrum of flaviogeranin A (7).

**Figure S10.** CD spectrum of flaviogeranin D (3).

**Table S1.** HR-ESI MS of known compounds 4-7.

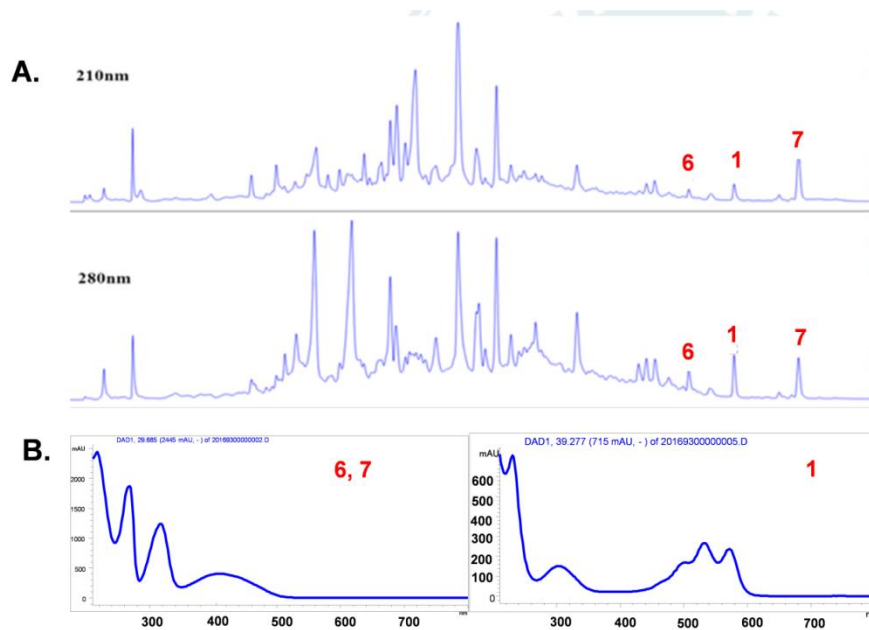

**Figure S1.** HPLC profile of *Streptomyces* sp. B9173 metabolites in MS media.  
 A. HPLC profile of *Streptomyces* sp. B9173 metabolites in MS media.  
 B. Specific UV spectrum of several naphthoquinone containing compounds.

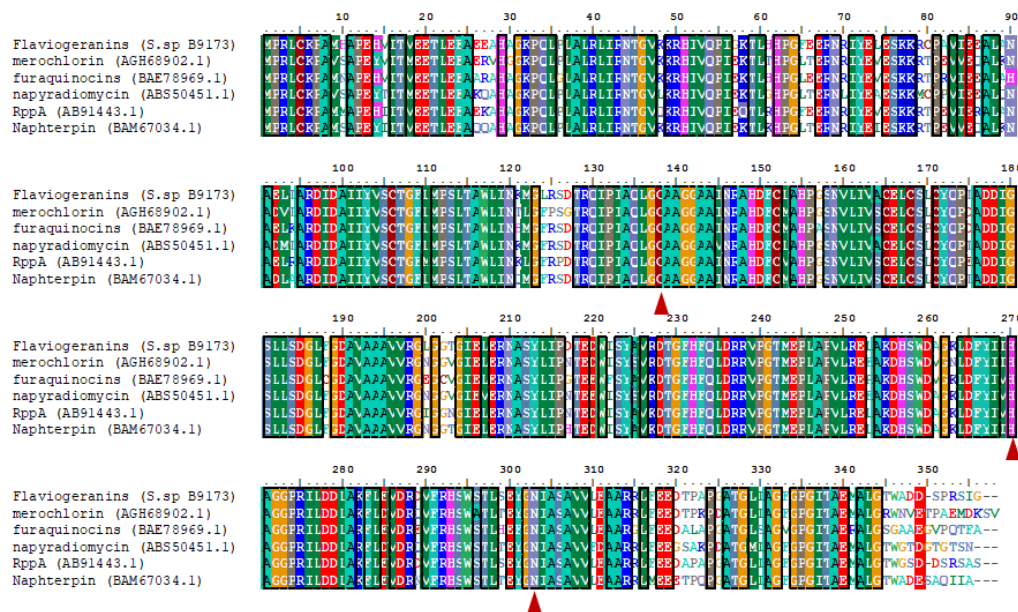

**Figure S2.** Sequence alignment of the type III PKS from gene clusters of naphthoquinone containing compounds. Sequence alignment revealed the conserved catalytic triad residues (Cys138, His270, and Asn303). AGH68902.1: type-III polyketide synthase [*Streptomyces* sp. CNH189]; BAE78969.1: Fur1 [*Streptomyces* sp. KO-3988]; ABS50451.1: NapB1 [*Streptomyces aculeolatus*]; BAB91443.1: Type III polyketide synthase RppA [*Streptomyces antibioticus*]; BAM67034.1: 1,3,6,8-tetrahydroxynaphthalene synthase [*Streptomyces* sp. CL190].

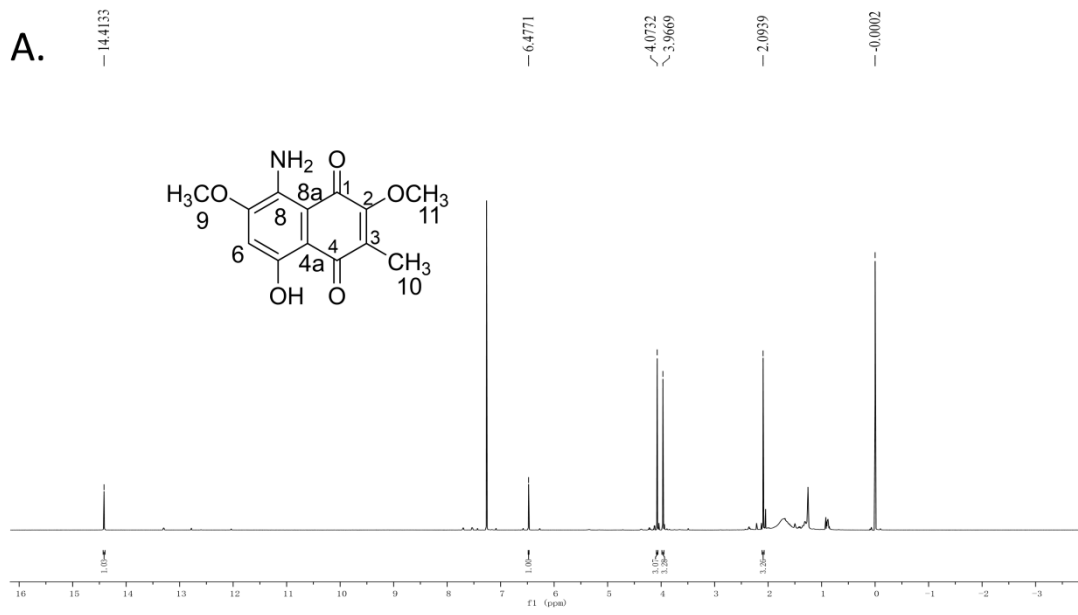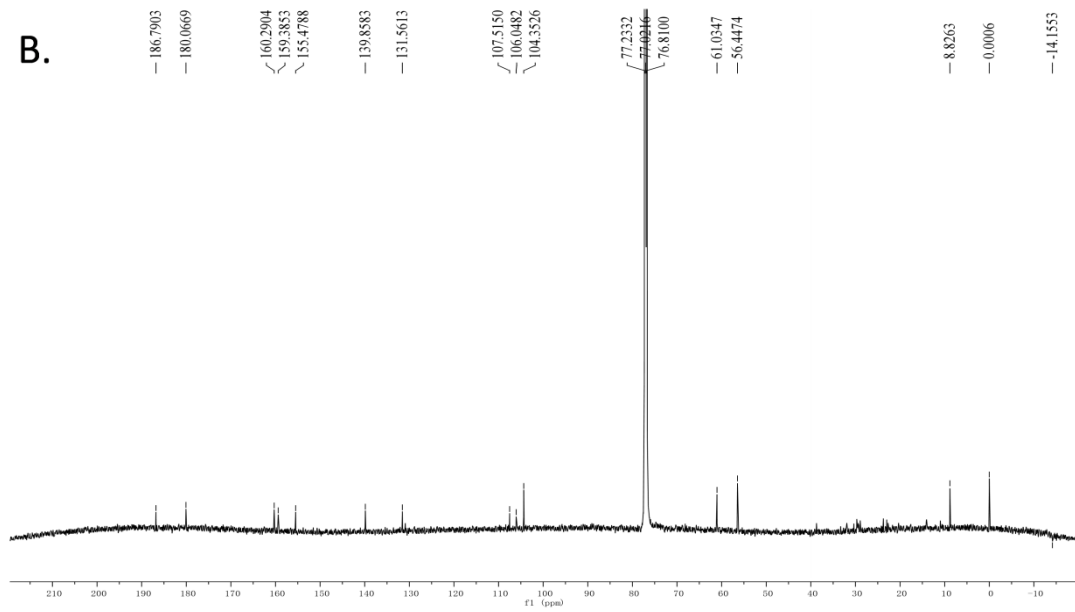

C.

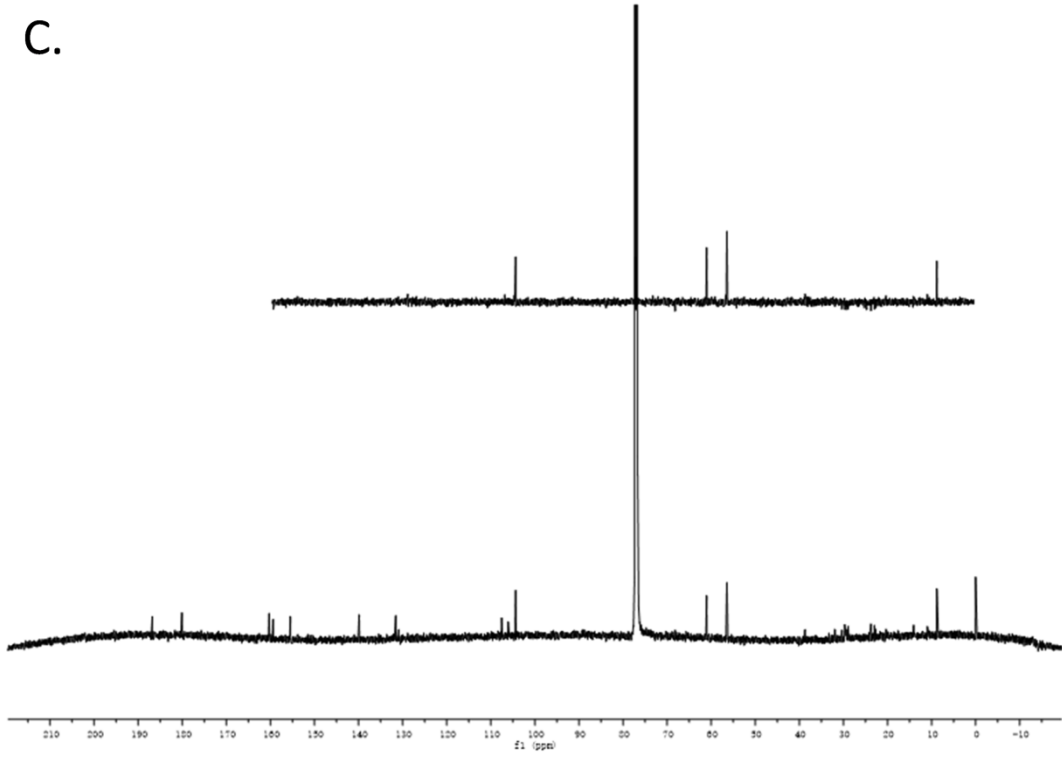

D.

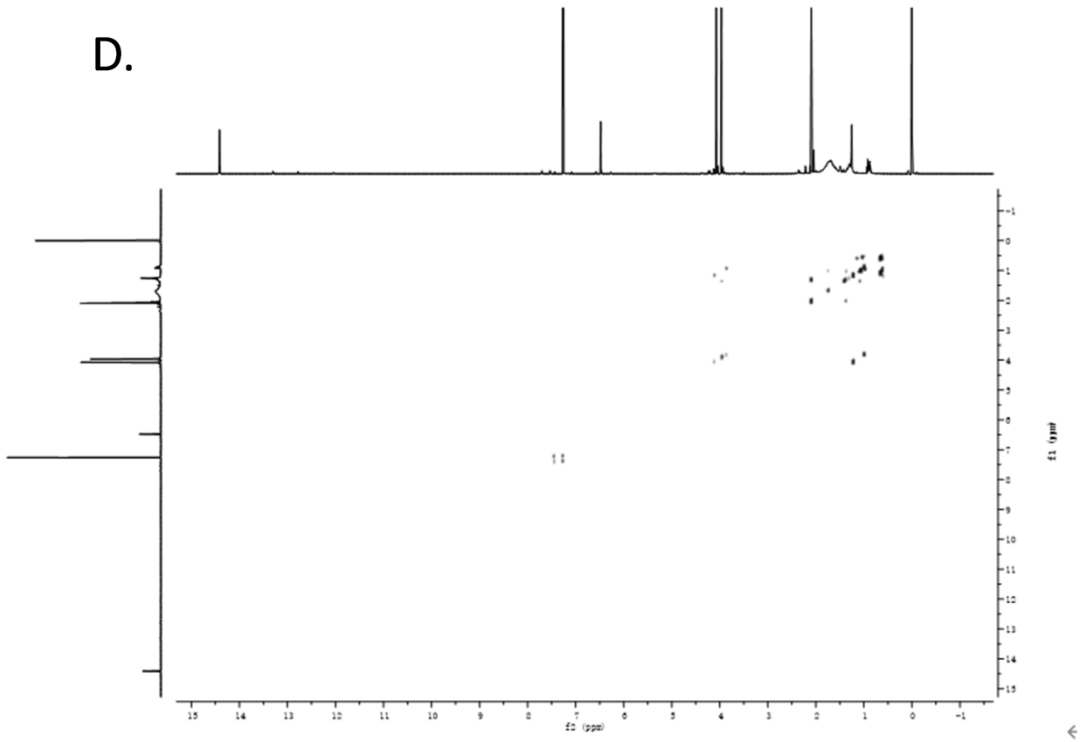

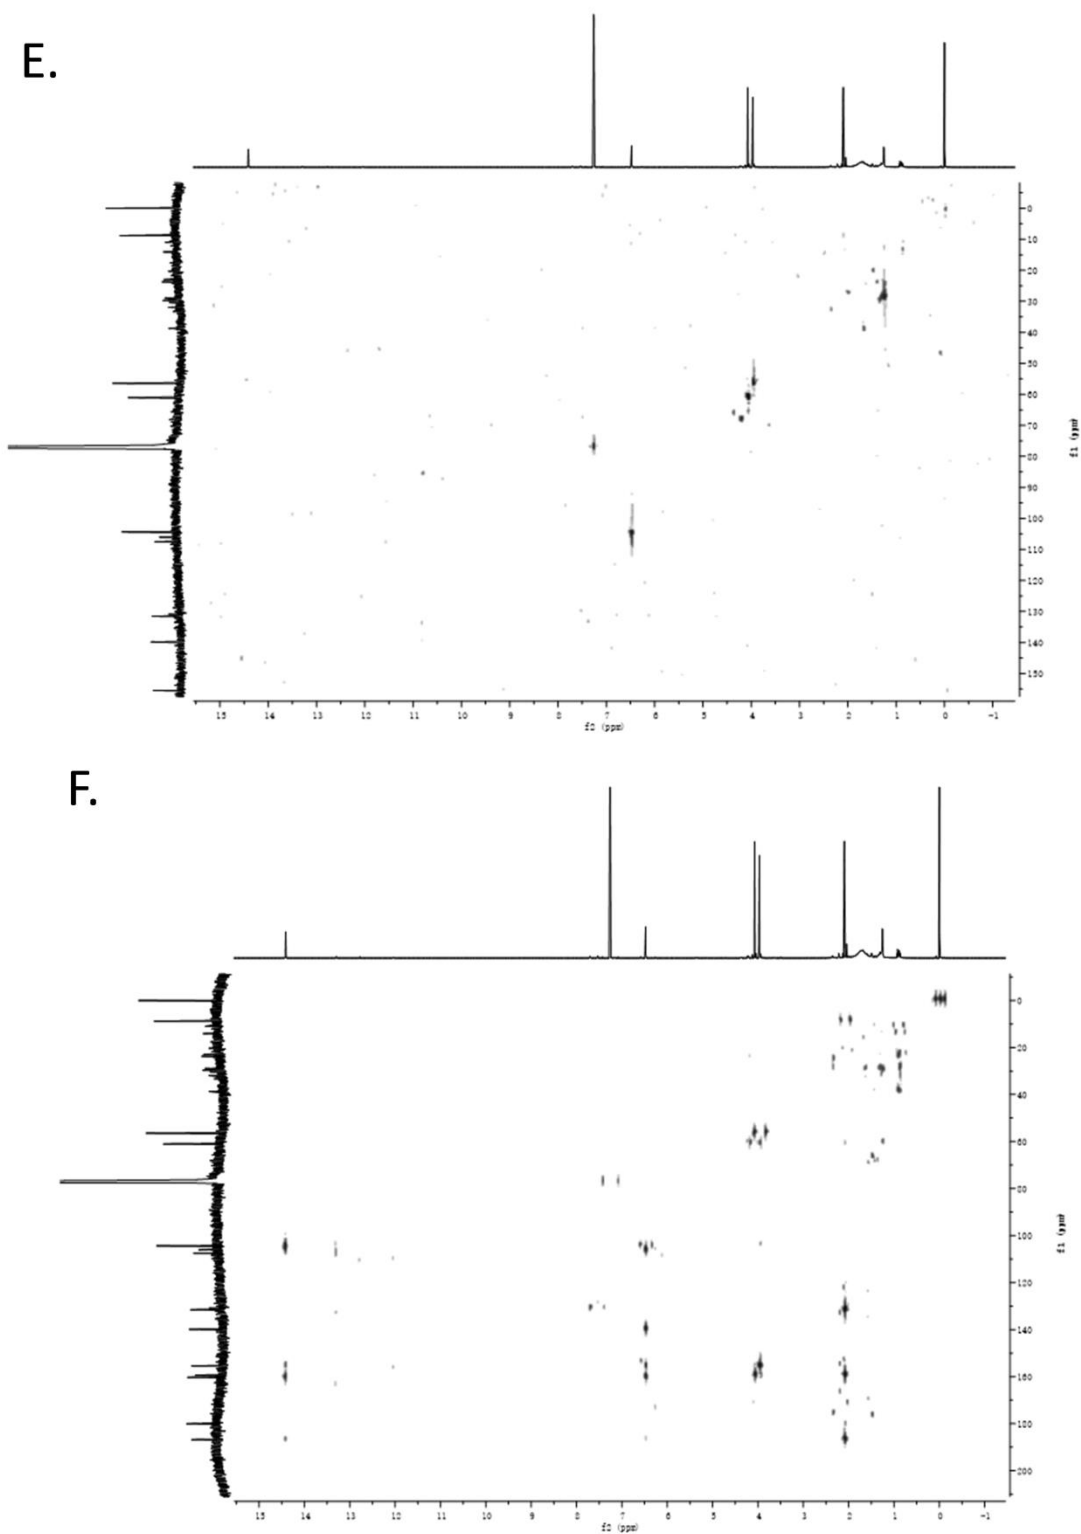

**Figure S3.** NMR spectra of flavioigeranin B1 (**1**). (A)  $^1\text{H}$  NMR spectrum. (B)  $^{13}\text{C}$  NMR spectrum. C. DEPT 135 spectrum. D.  $^1\text{H}$ - $^1\text{H}$  COSY spectrum. E. HSQC spectrum. F. HMBC spectrum.

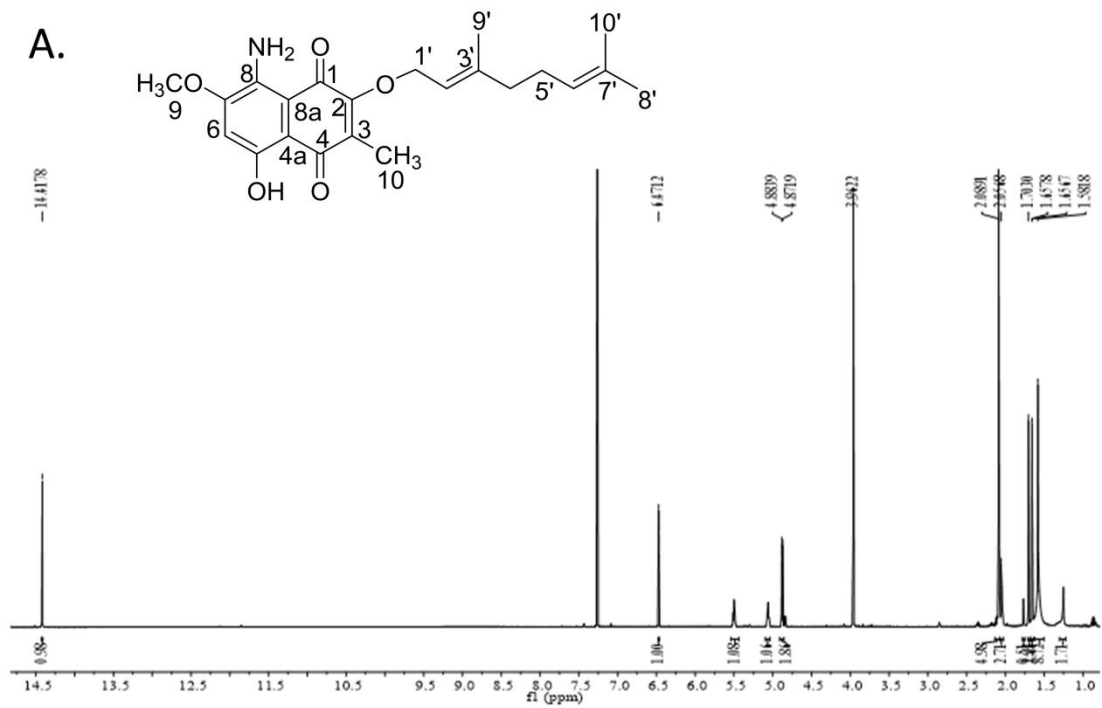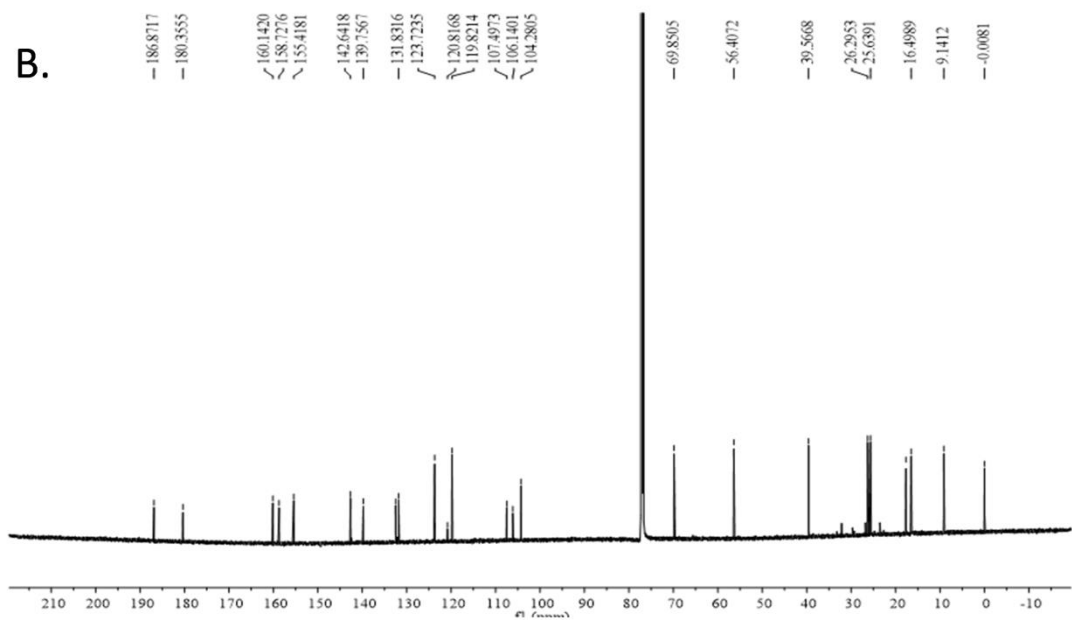

C.

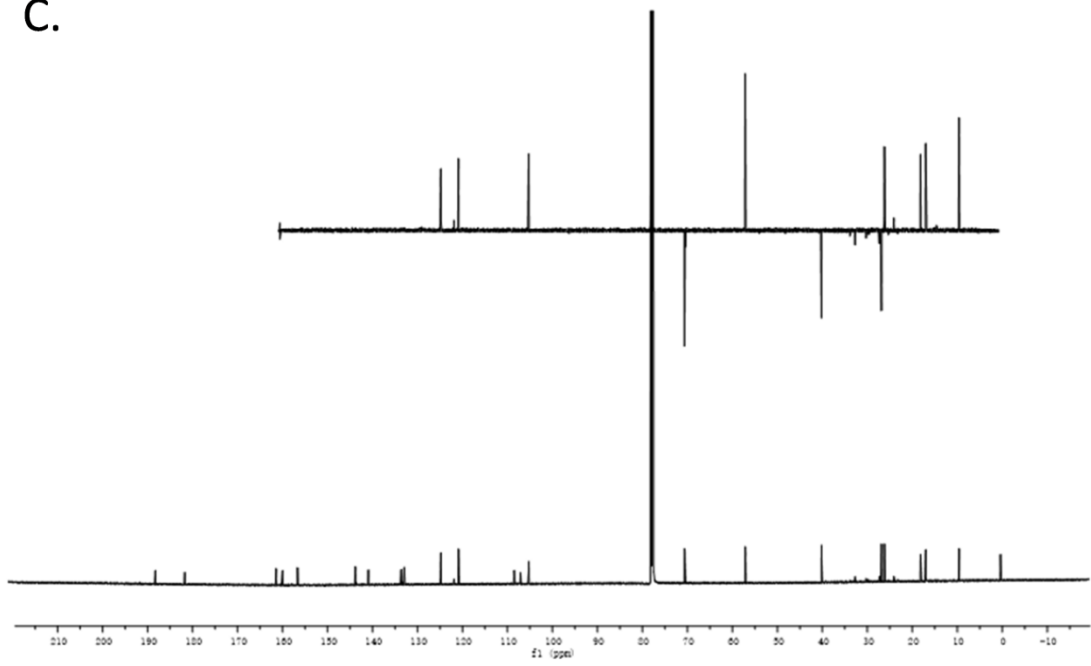

D.

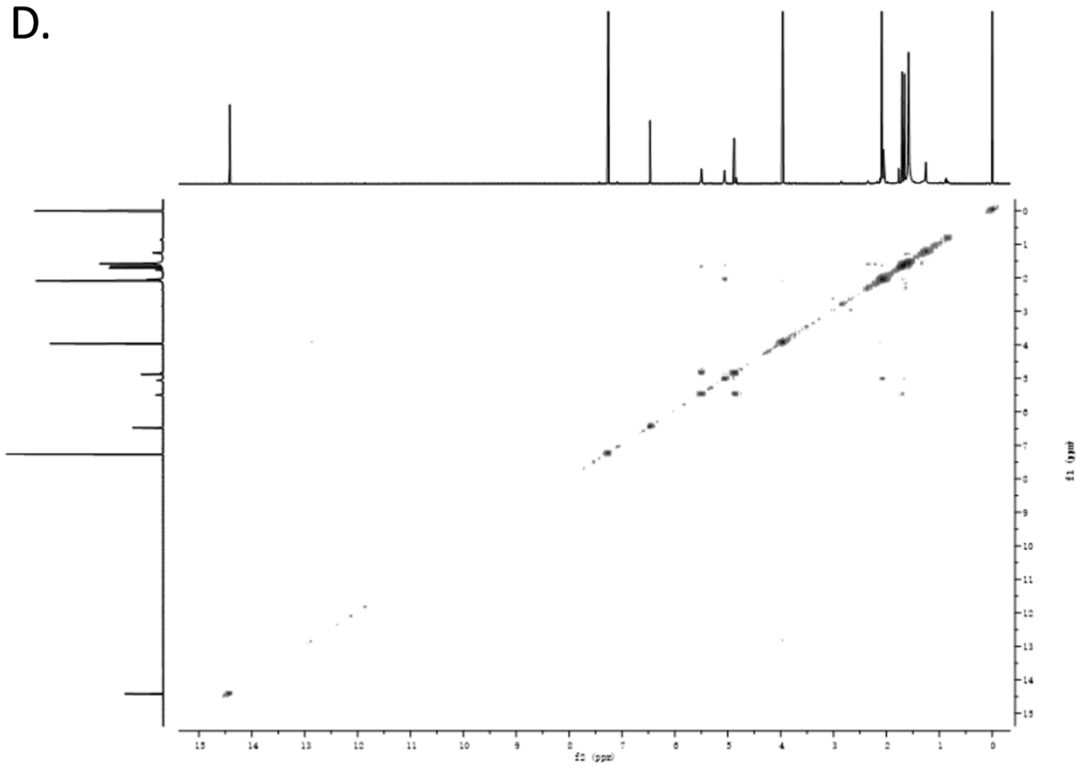

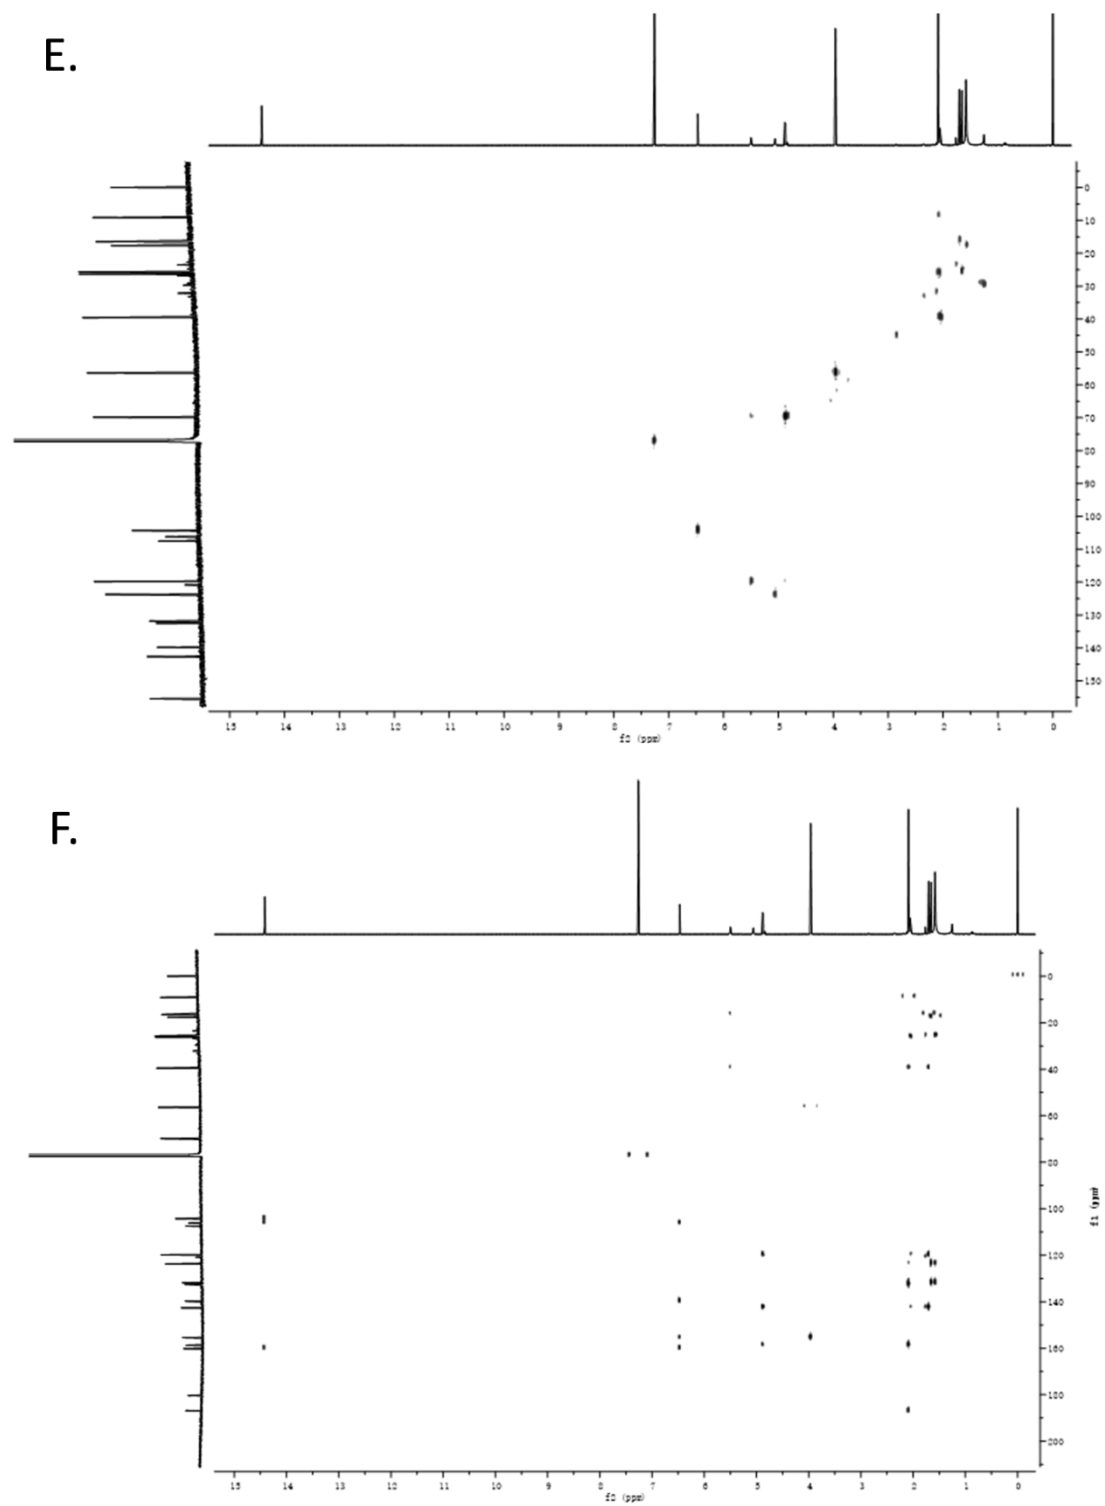

**Figure S4.** NMR spectra of flavioigeranin B2 (2).

A.  $^1\text{H}$  NMR spectrum. B.  $^{13}\text{C}$  NMR spectrum. C. DEPT 135 spectrum. D.  $^1\text{H}$ - $^1\text{H}$  COSY spectrum. E. HSQC spectrum. F. HMBC spectrum.



A.

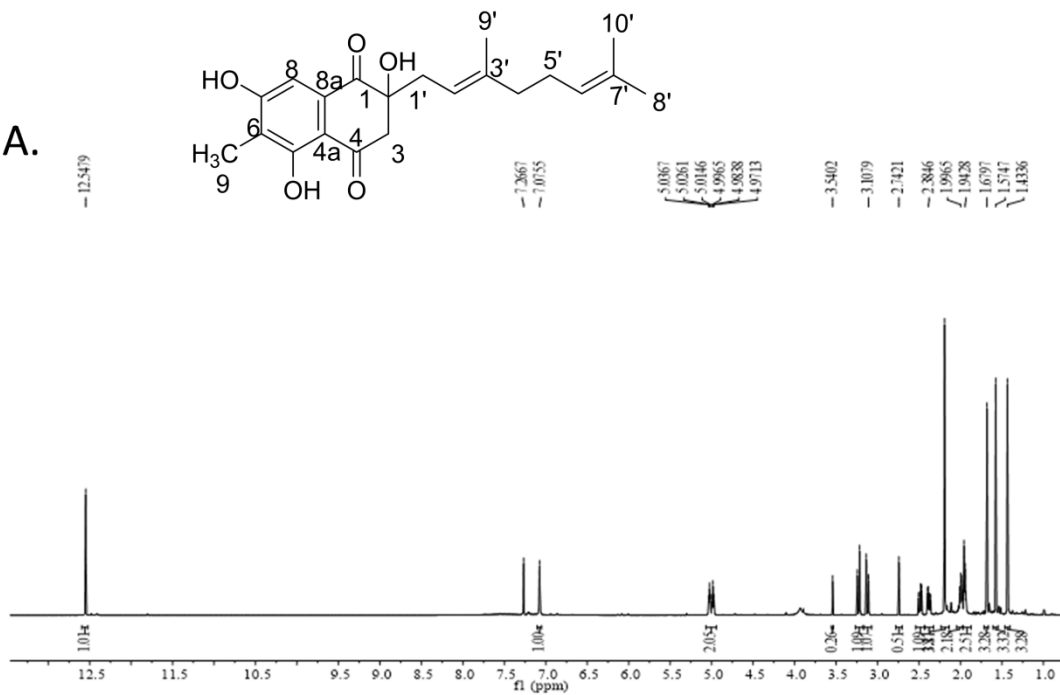

B.

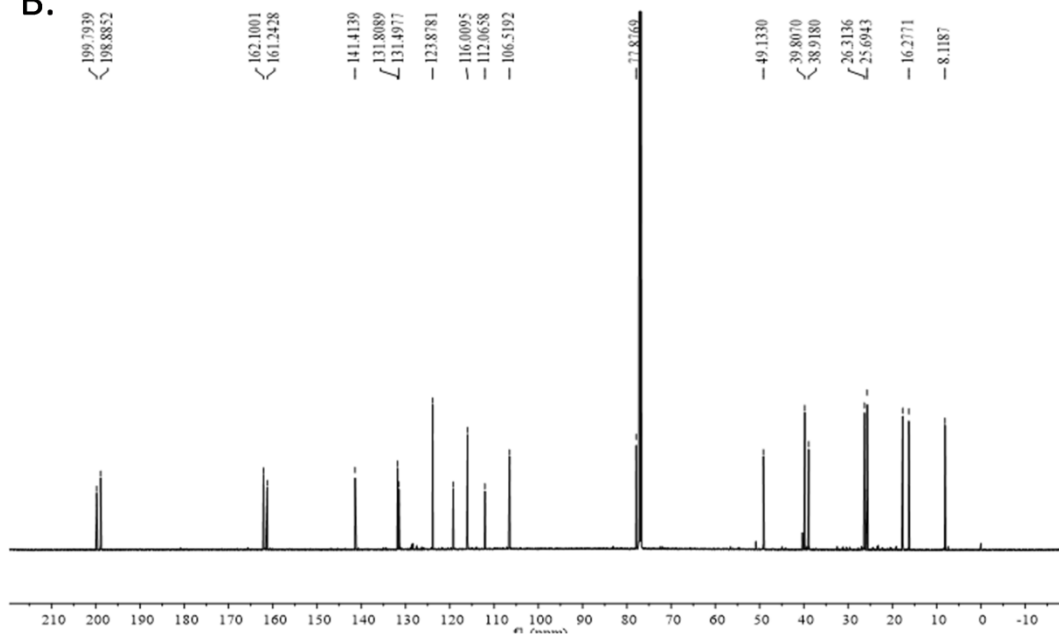

C.

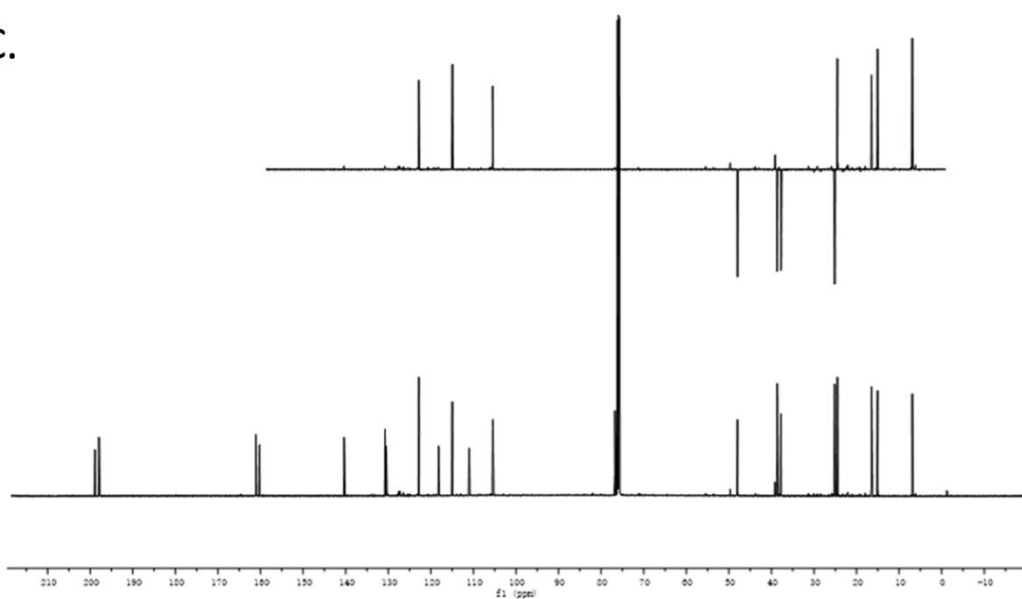

D.

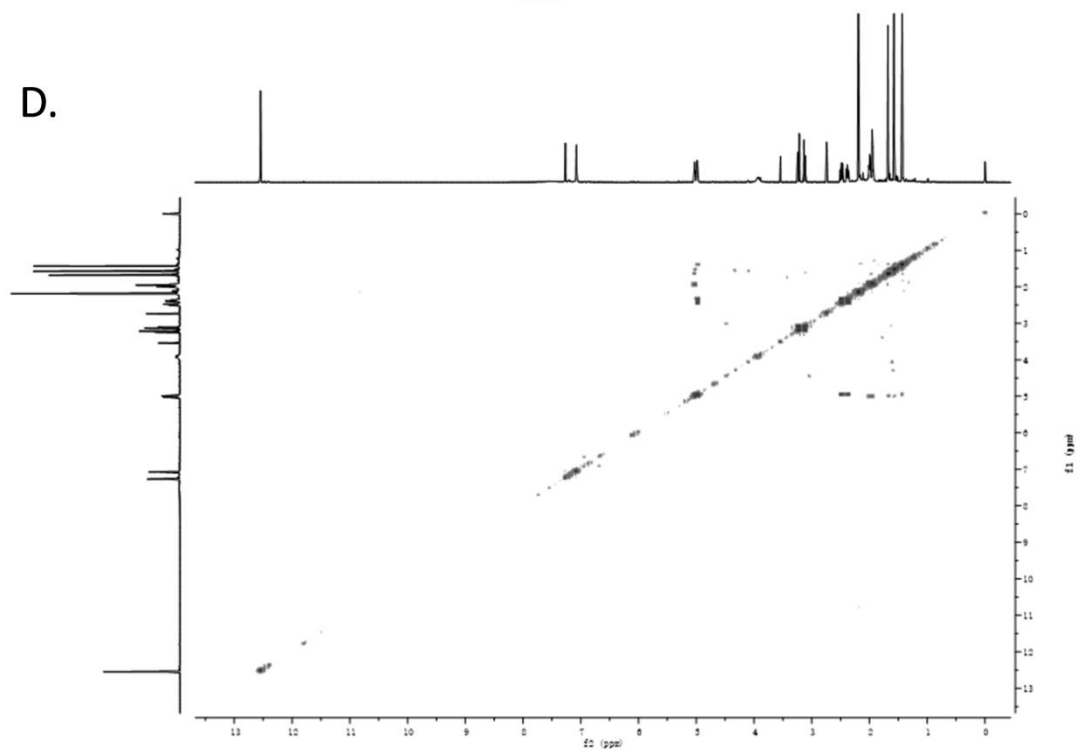

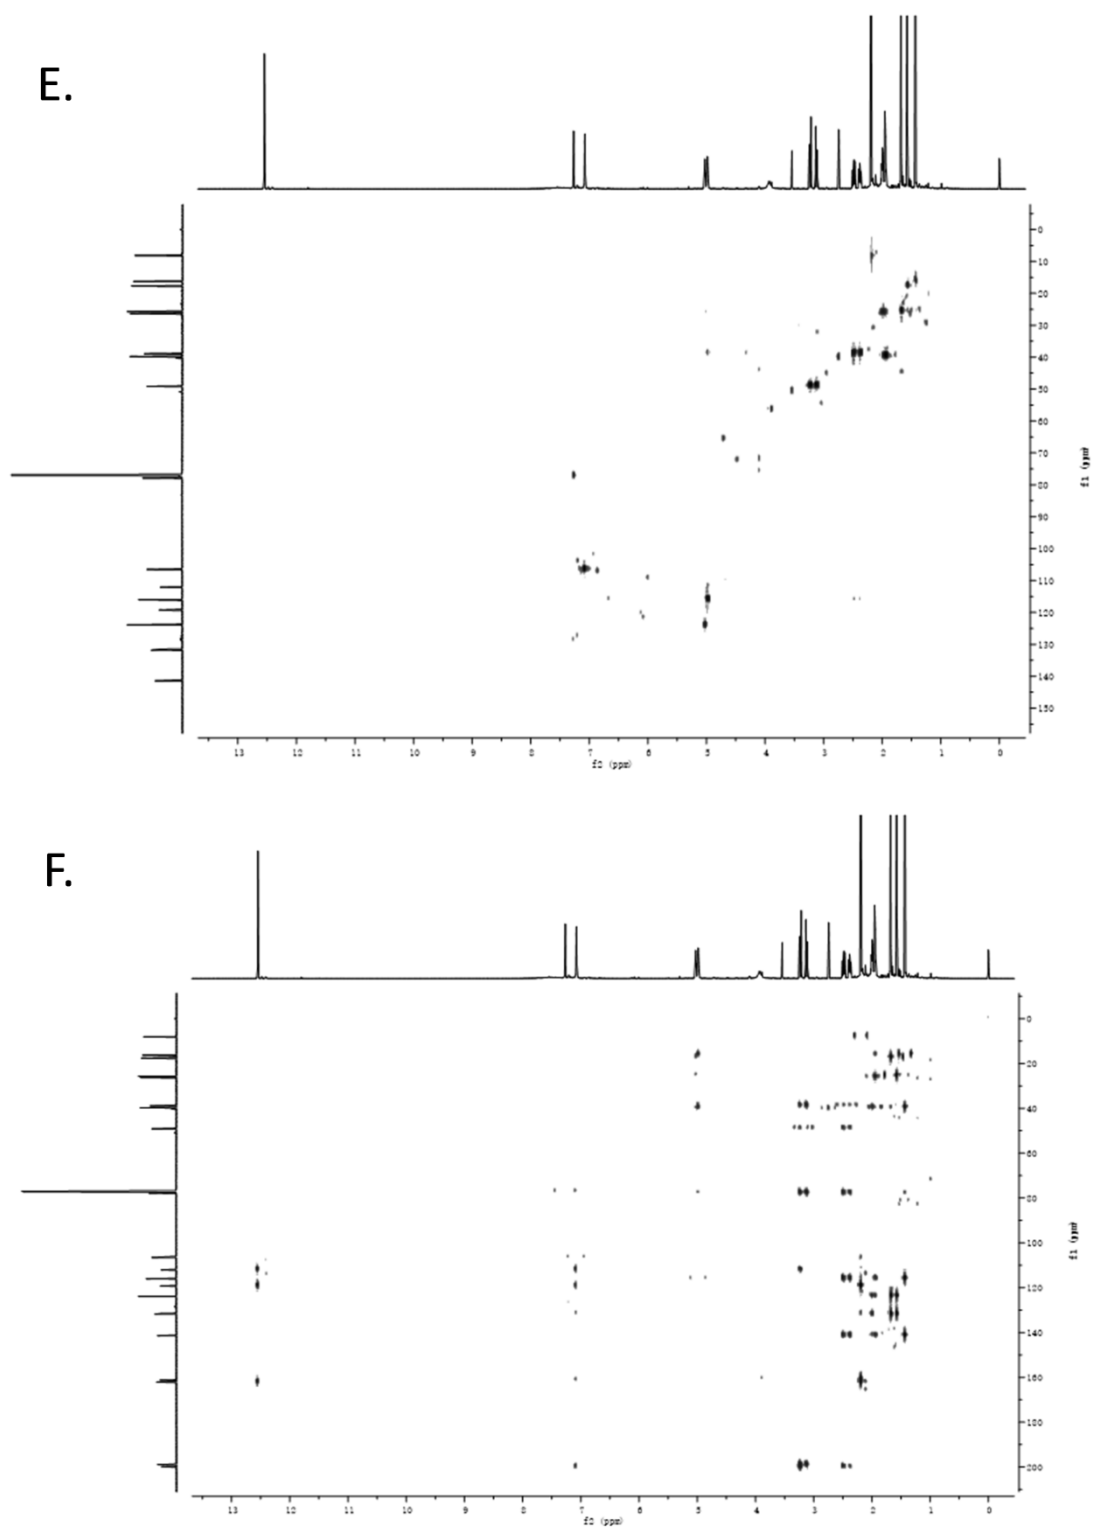

**Figure S5.** NMR spectra of faviogeranin D (3). A.  $^1\text{H}$  NMR spectrum. B.  $^{13}\text{C}$  NMR spectrum. C. DEPT 135 spectrum. D.  $^1\text{H}$ - $^1\text{H}$  COSY spectrum. E. HSQC spectrum. F. HMBC spectrum.

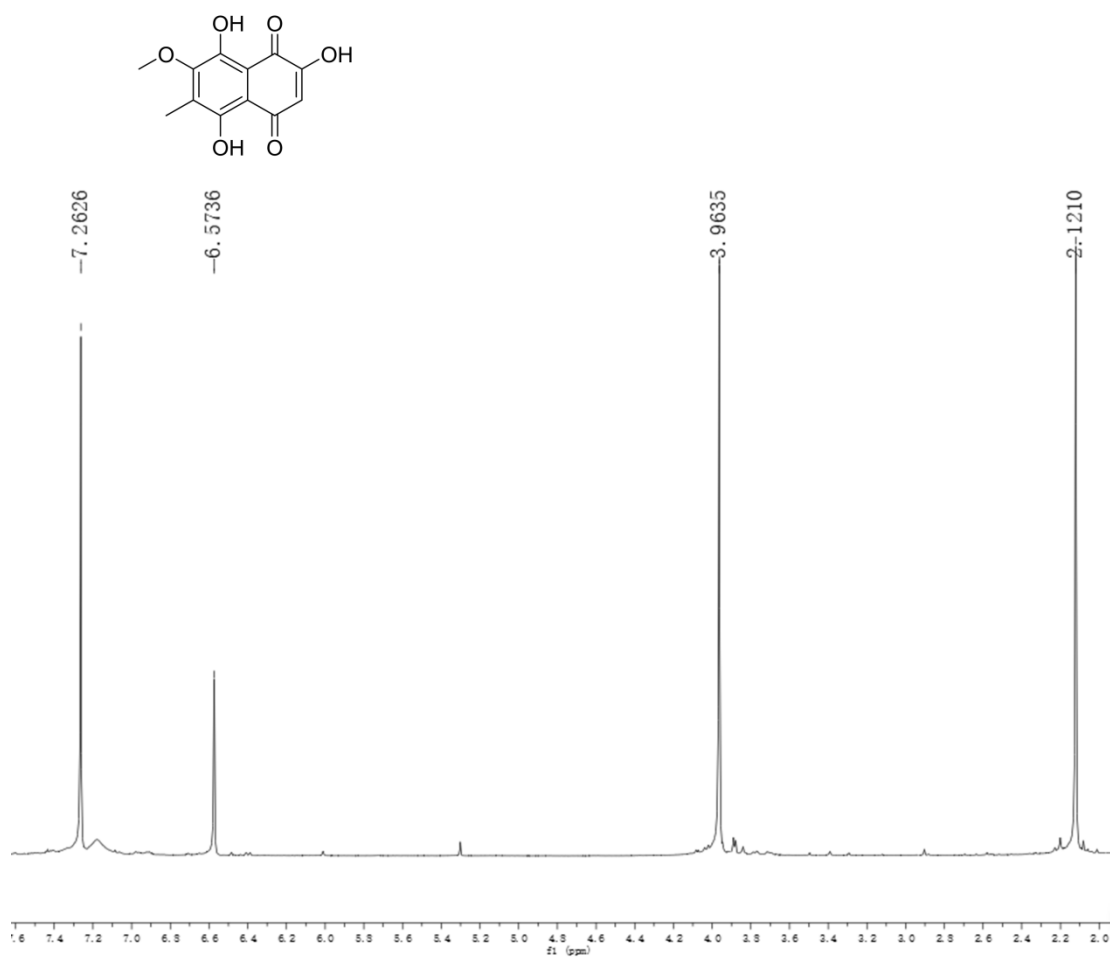

**Figure S6.** <sup>1</sup>H NMR spectrum of flaviogeranin C1 (**4**).

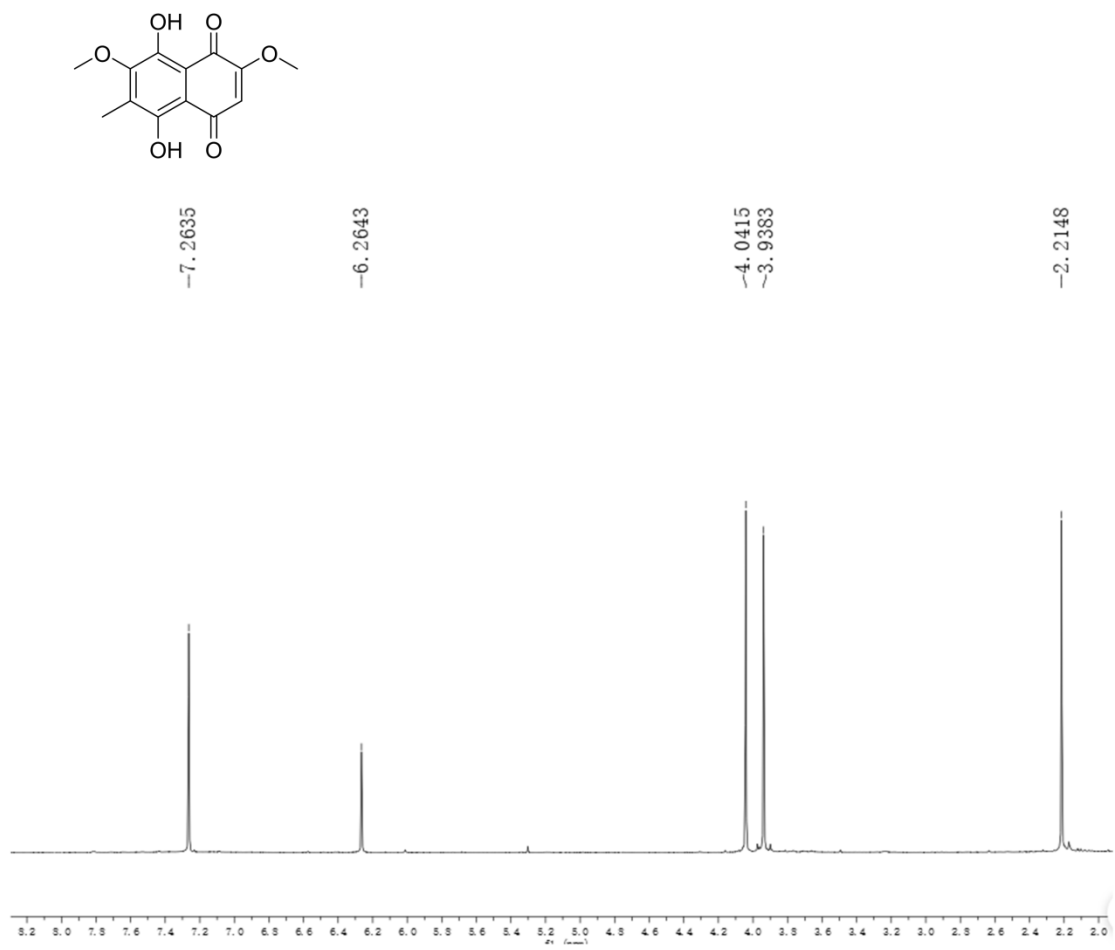

**Figure S7.** <sup>1</sup>H NMR spectrum of flaviogeranin C2 (5).

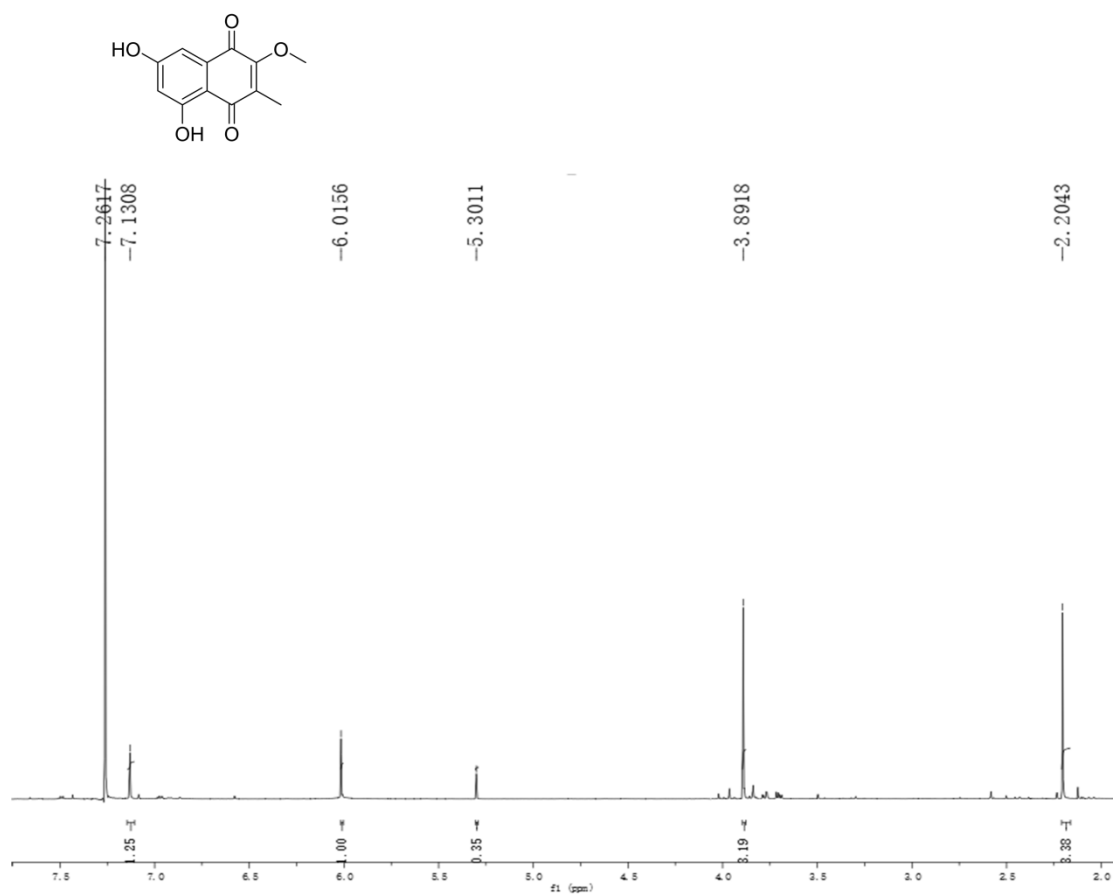

**Figure S8.** <sup>1</sup>H NMR spectrum of flaviogeranin A1 (**6**).

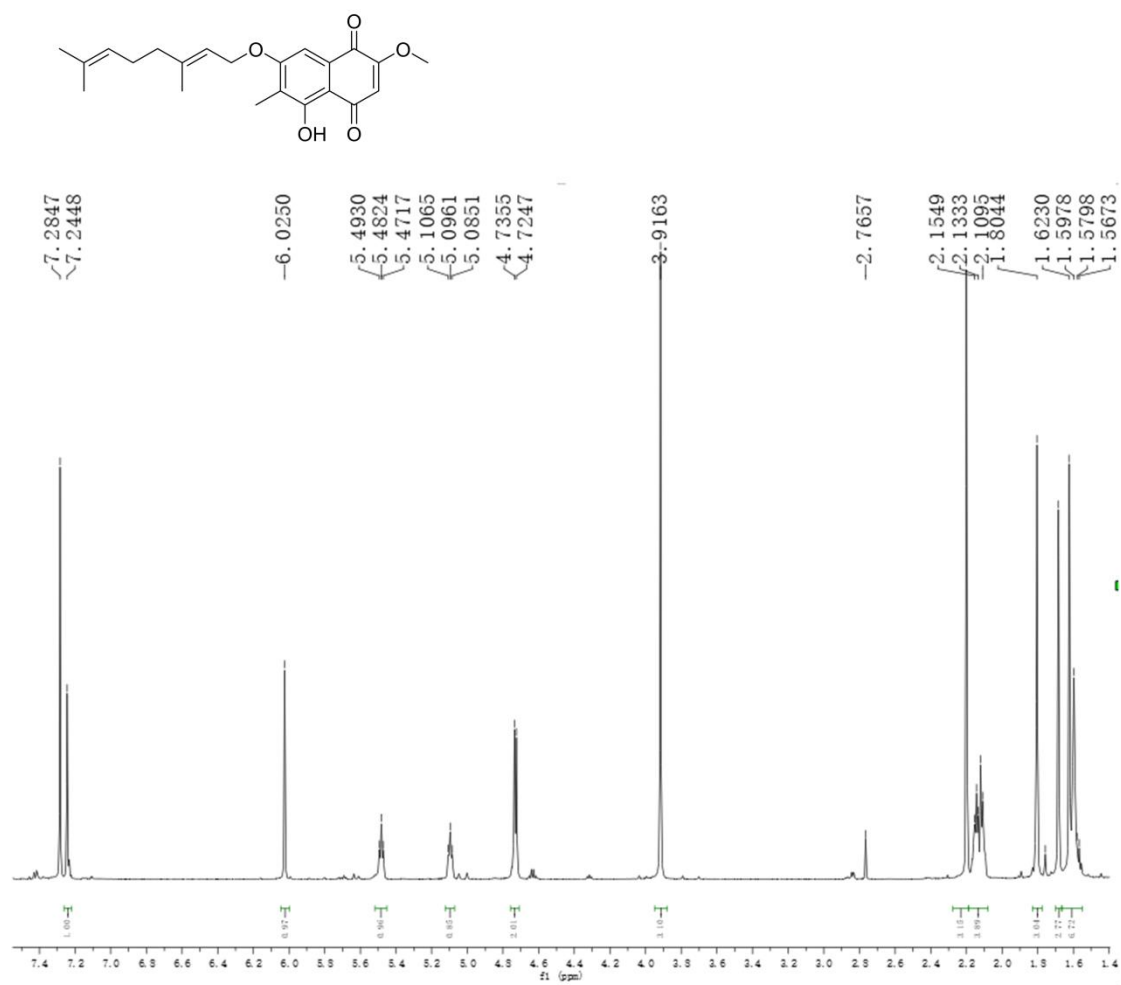

Figure S9.  $^1\text{H}$  NMR spectrum of flaviogeranin A (7).

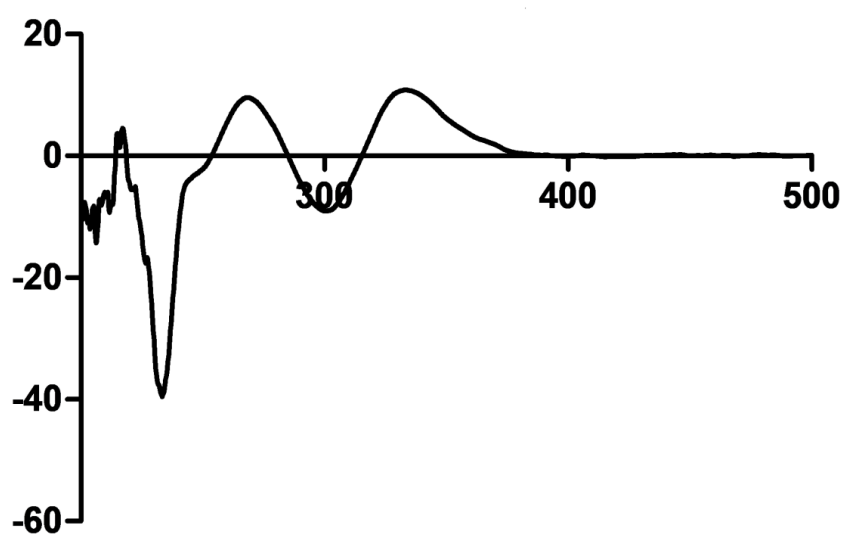

Figure S10. CD spectrum of flaviogeranin D (3).

Table S1. HR-ESI MS of known compounds 4-7.

| <b>Compounds</b> | <b>Expected <math>m/z</math> [M + H]<sup>+</sup></b> | <b>Found <math>m/z</math> [M + H]<sup>+</sup></b> |
|------------------|------------------------------------------------------|---------------------------------------------------|
| <b>4</b>         | 251.0550                                             | 251.0451                                          |
| <b>5</b>         | 265.0707                                             | 265.0681                                          |
| <b>6</b>         | 235.0601                                             | 235.0602                                          |
| <b>7</b>         | 371.1853                                             | 371.1858                                          |
